# Supplementary material
Source: Springer Nature journal article supplement (https://www.springermedizin.de/resource/supplementary/12943_2003_46_MOESM13_ESM.pdf/9553318)

CAT activity

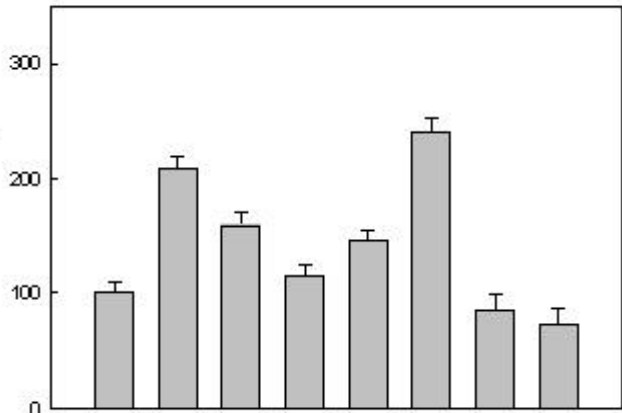

|            |   |   |   |   |   |   |   |   |
|------------|---|---|---|---|---|---|---|---|
| p8-CAT     | + | + | + | + | + | + | + | + |
| TGFβ-1     |   | + |   |   |   | + |   | + |
| RI ACT     |   |   | + |   |   |   |   |   |
| RII DN     |   |   |   | + |   |   |   |   |
| Smad4      |   |   |   |   | + | + |   |   |
| DPC4 1-514 |   |   |   |   |   |   | + | + |

CAT activity

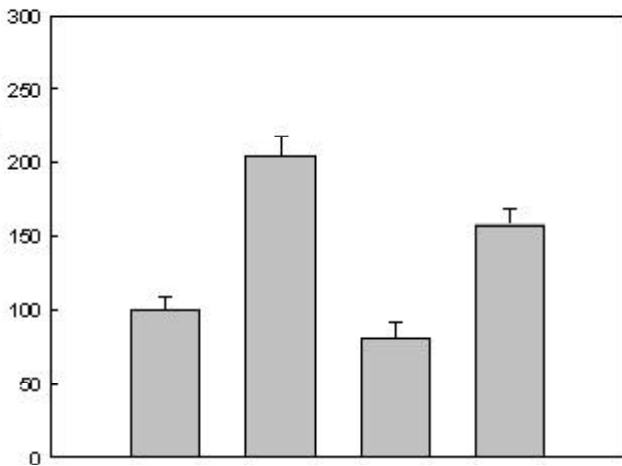

|          |   |   |   |   |
|----------|---|---|---|---|
| p8-CAT   | + | + | + | + |
| TGFβ-1   |   | + |   | + |
| SB203580 |   |   | + | + |

Supplement: MOESM13 [file 9553318]
